# Supplementary material
Source: PubMed Central journal article supplement (PMC10017386)
Supplement: mmc1.pdf [file mmc1.pdf]

**Supplemental information**

**Spheromers reveal robust T cell responses to the  
Pfizer/BioNTech vaccine and attenuated peripheral  
CD8<sup>+</sup> T cell responses post SARS-CoV-2 infection**

**Fei Gao, Vamsee Mallajoyula, Prabhu S. Arunachalam, Kattria van der Ploeg, Monali Manohar, Katharina Röltgen, Fan Yang, Oliver Wirz, Ramona Hoh, Emily Haraguchi, Ji-Yeun Lee, Richard Willis, Vasanthi Ramachandiran, Jiefu Li, Karan Raj Kathuria, Chunfeng Li, Alexandra S. Lee, Mihir M. Shah, Sayantani B. Sindher, Joseph Gonzalez, John D. Altman, Taia T. Wang, Scott D. Boyd, Bali Pulendran, Prasanna Jagannathan, Kari C. Nadeau, and Mark.M. Davis**

**Supplementary table 1**

| HLA-restriction | Protein     | ID              | SARS-CoV-2 sequence |
|-----------------|-------------|-----------------|---------------------|
| HLA-A*02:01     | M           | M_15            | KLLEQWNLV           |
|                 |             | M_26            | FLFLTWICL           |
|                 |             | M_61            | TLACFVLAA           |
|                 |             | M_89            | GLMWLSYFI           |
|                 | N           | N_222           | LLLDRLNQL           |
|                 |             | N_316           | GMSRIGMEV           |
|                 | ORF1ab      | ORF1ab_84       | VMVELVAEL           |
|                 |             | ORF1ab_1675     | YLATALLTL           |
|                 |             | ORF1ab_3013     | SLPGVFCGV           |
|                 |             | ORF1ab_3467     | VLAWLYAAV           |
|                 |             | ORF1ab_3482     | FLNRFTTTL           |
|                 |             | ORF1ab_3710     | TLMNVLTLV           |
|                 |             | ORF1ab_3732     | SMWALIISV           |
|                 |             | ORF1ab_3871     | VLLSVLQQL           |
|                 |             | ORF1ab_4032     | MLFTMLRKL           |
|                 |             | ORF1ab_4094     | ALWEIQQVV           |
|                 |             | ORF1ab_4515     | TMADLVYAL           |
|                 | ORF1ab_4725 | IFVDGVPFV       |                     |
|                 | S           | S_269           | YLQPRTFLL           |
|                 |             | S_691           | SIIAYTMSL           |
|                 |             | S_821           | LLFNKVTLA           |
| S_976           |             | VLNDILSRL       |                     |
| S_983           |             | RLDKVEAEV       |                     |
| S_1000          |             | RLQSLQTYV       |                     |
| S_1220          |             | FIAGLIAIV       |                     |
| HLA-B*40:01     | N           | N_322           | MEVTPSGTWL          |
|                 | ORF1ab      | ORF1ab_1705     | GEAANFCAL           |
|                 |             | ORF1ab_2325     | AEWFLAYIL           |
|                 |             | ORF1ab_744      | GETLPTEVL           |
|                 |             | ORF1ab_1548     | GEVITFDNL           |
|                 |             | ORF1ab_2069     | TEVVGDIIL           |
|                 | S           | S_153           | MESEFRVYS           |
|                 |             | S_168           | FEYVSQPFL           |
|                 |             | S_505           | YQPYRVVVL           |
|                 |             | S_582           | LEILDITPC           |
|                 |             | S_618           | TEVPVAIHA           |
|                 |             | S_1016          | AEIRASANL           |
|                 |             | S_1257          | DEDDSEPVL           |
| HLA-DRB1*15:01  | M           | M_91            | MWLSYFIASFRLFAR     |
|                 |             | M_166           | KEITVATSRTLSTYYK    |
|                 | N           | N_301           | WPQIAQFAPSASAFF     |
|                 |             | N_346           | FKDQVILLNKHIDAY     |
|                 | ORF1ab      | ORF1ab_471      | EEIAIILASFSASTS     |
|                 |             | ORF1ab_5016     | RAMPNMLRIMASLVL     |
|                 | S           | S_51            | TQDLFLPFFSNVTWF     |
|                 |             | S_56            | LPFFSNVTWFHAIHV     |
|                 |             | S_191           | EFVFKNIDGYFKIYS     |
|                 |             | S_236           | TRFQTLALHRSYLT      |
| S_896           |             | IPFAMQMAYRFNGIG |                     |

**Supplementary Table 1. List of SARS-CoV-2 epitopes evaluated in this study.** Spheromers displaying these peptides in context of the indicated MHC-I/II proteins were used to study the CD8<sup>+</sup> and CD4<sup>+</sup> T cell responses against the SARS-CoV-2 proteins (Wuhan-1 strain). The table shows the HLA-restriction, source protein, epitope start number and peptide sequence. Related to STAR Methods.

## Supplementary figure 1

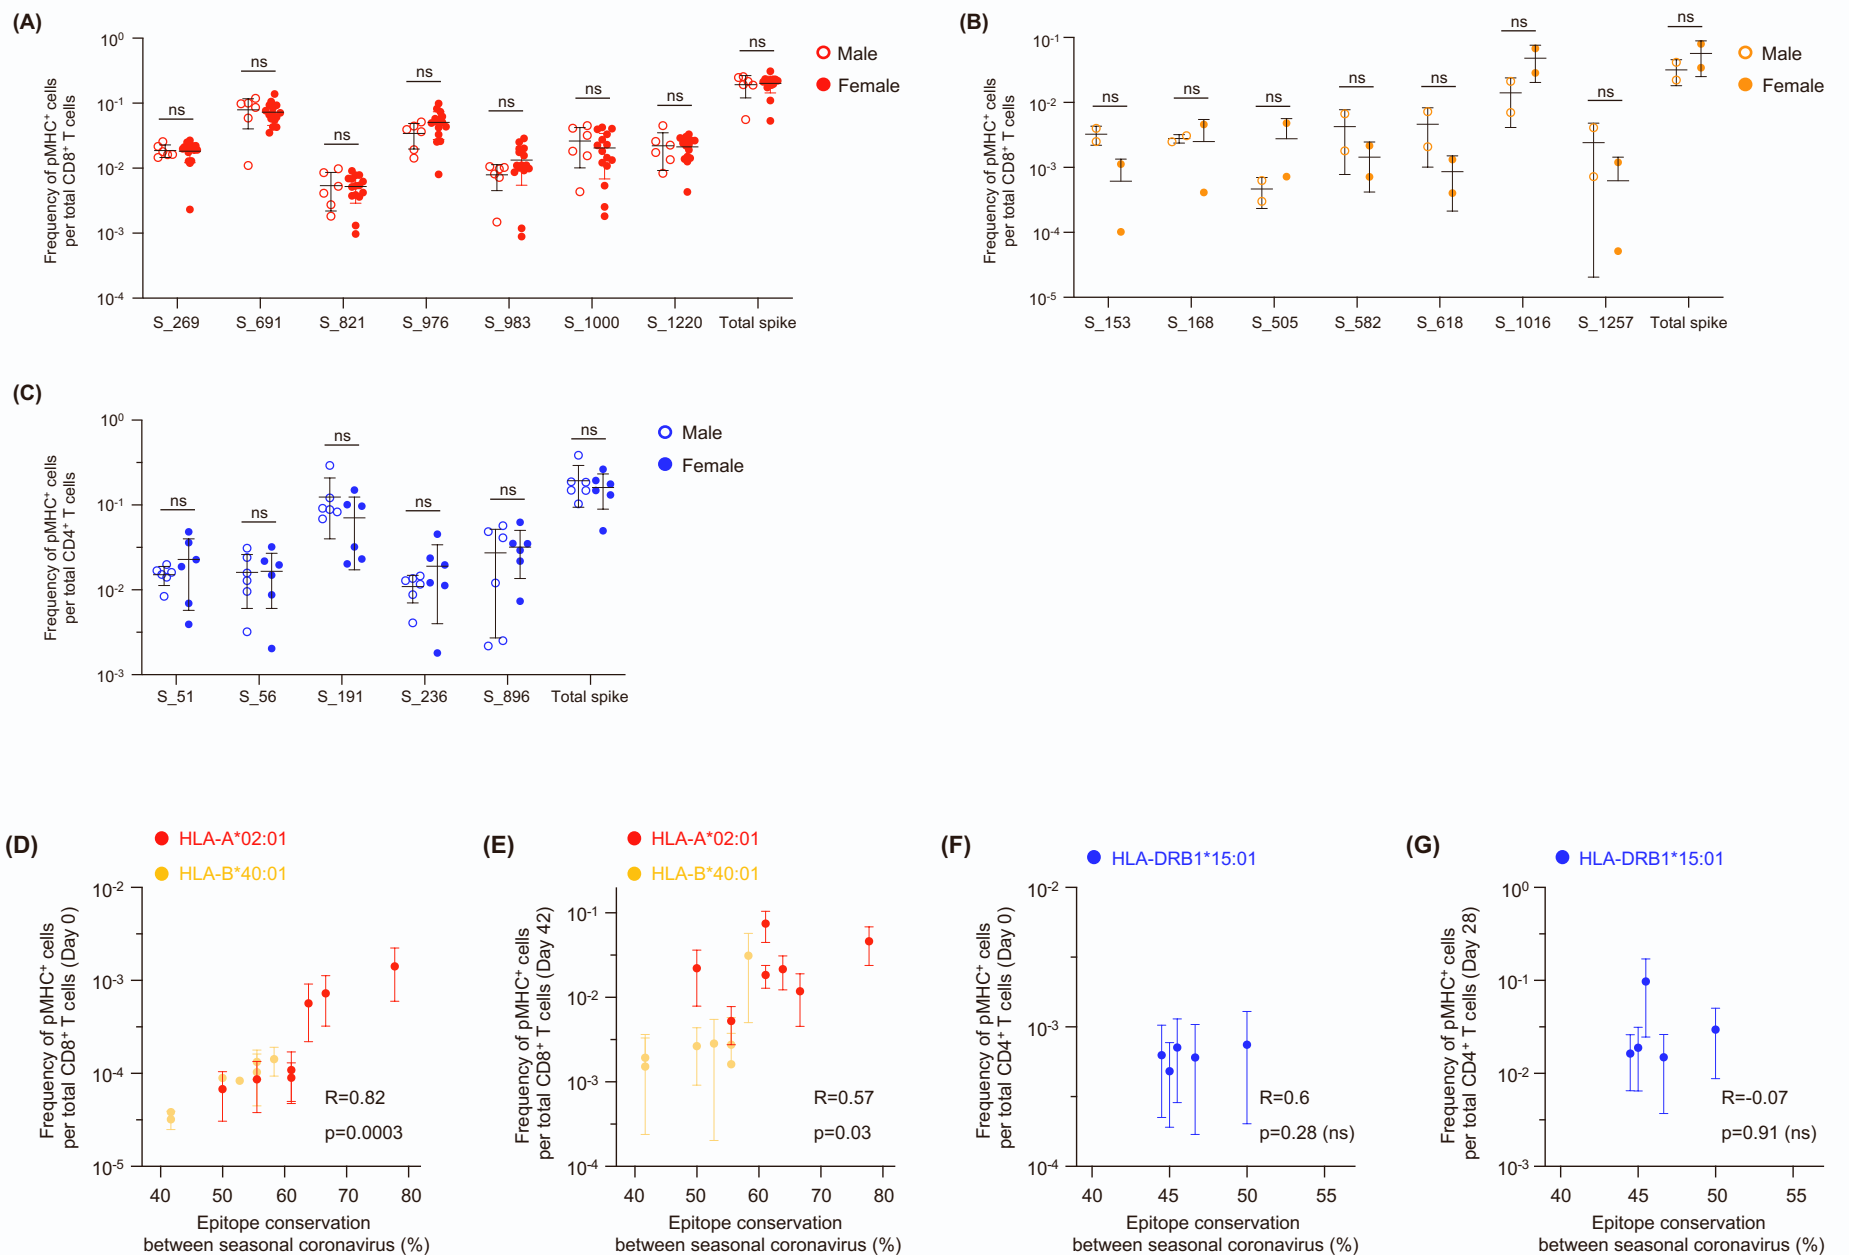

### Supplementary figure 1. Correlation between spike-specific T cell response, sex and epitope conservation. (A and B)

Correlation between epitope specific CD8<sup>+</sup> T cell response (day 42) and sex in (A) HLA-A\*02:01 and (B) HLA-B\*40:01 restricted vaccinees. (C) Correlation between epitope specific CD4<sup>+</sup> T cell response (day 28) and gender in HLA-DRB1\*15:01 restricted vaccinees. (D) Correlation between baseline spike-specific CD8<sup>+</sup> T cell response (day 0) and the conservation of tested epitope. (E) Correlation between peak spike specific CD8<sup>+</sup> T cell response (day 42) and the conservation of tested epitope. (F) Correlation between baseline spike specific CD4<sup>+</sup> T cell response (day 0) and the conservation of tested epitope. (G) Correlation between peak spike specific CD4<sup>+</sup> T cell response (day 28) and the conservation of tested epitope. Data are presented as mean  $\pm$  SD. P values were determined by Mann–Whitney test with Holm–Šídák method. Related to Figure 1 and 2.

Supplementary figure 2

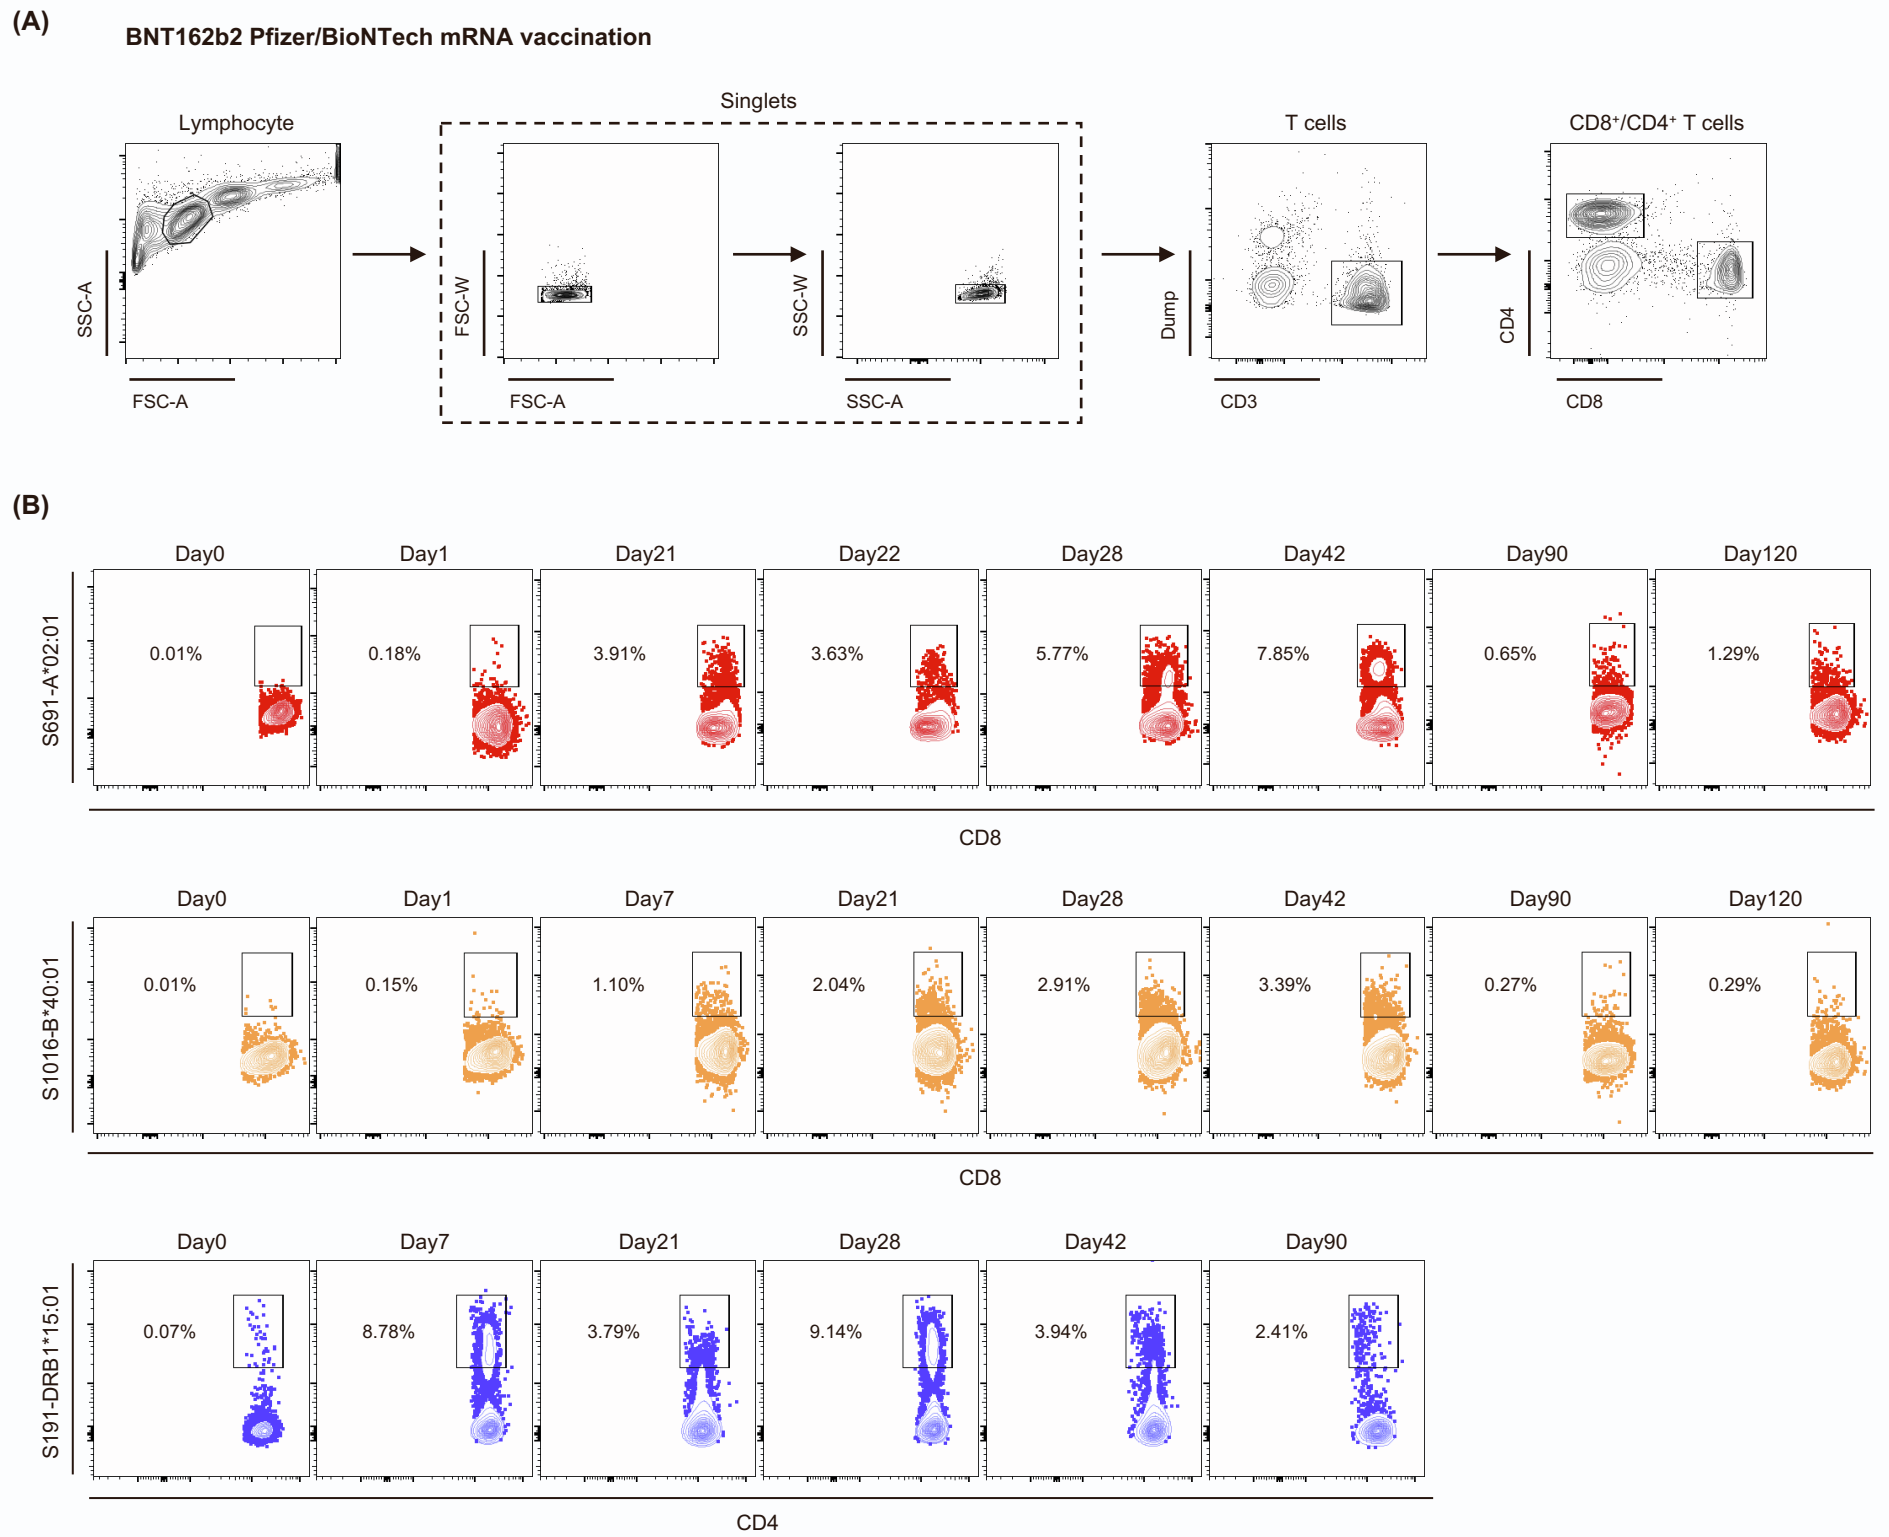

**Supplementary figure 2. Representative FACS plots of epitope-specific CD8<sup>+</sup> and CD4<sup>+</sup> T cells after spheromer staining.**

**(A)** Gating strategy and **(B)** representative FACS plots of dominant epitopes HLA-A\*02:01/S691 (upper panel) HLA-B\*40:01/S1016 (middle panel) and HLA-DRB1\*15:01/S191 (lower panel) from SARS-CoV-2 naïve vaccinees. Related to Figure 1 and 2.

### Supplementary figure 3

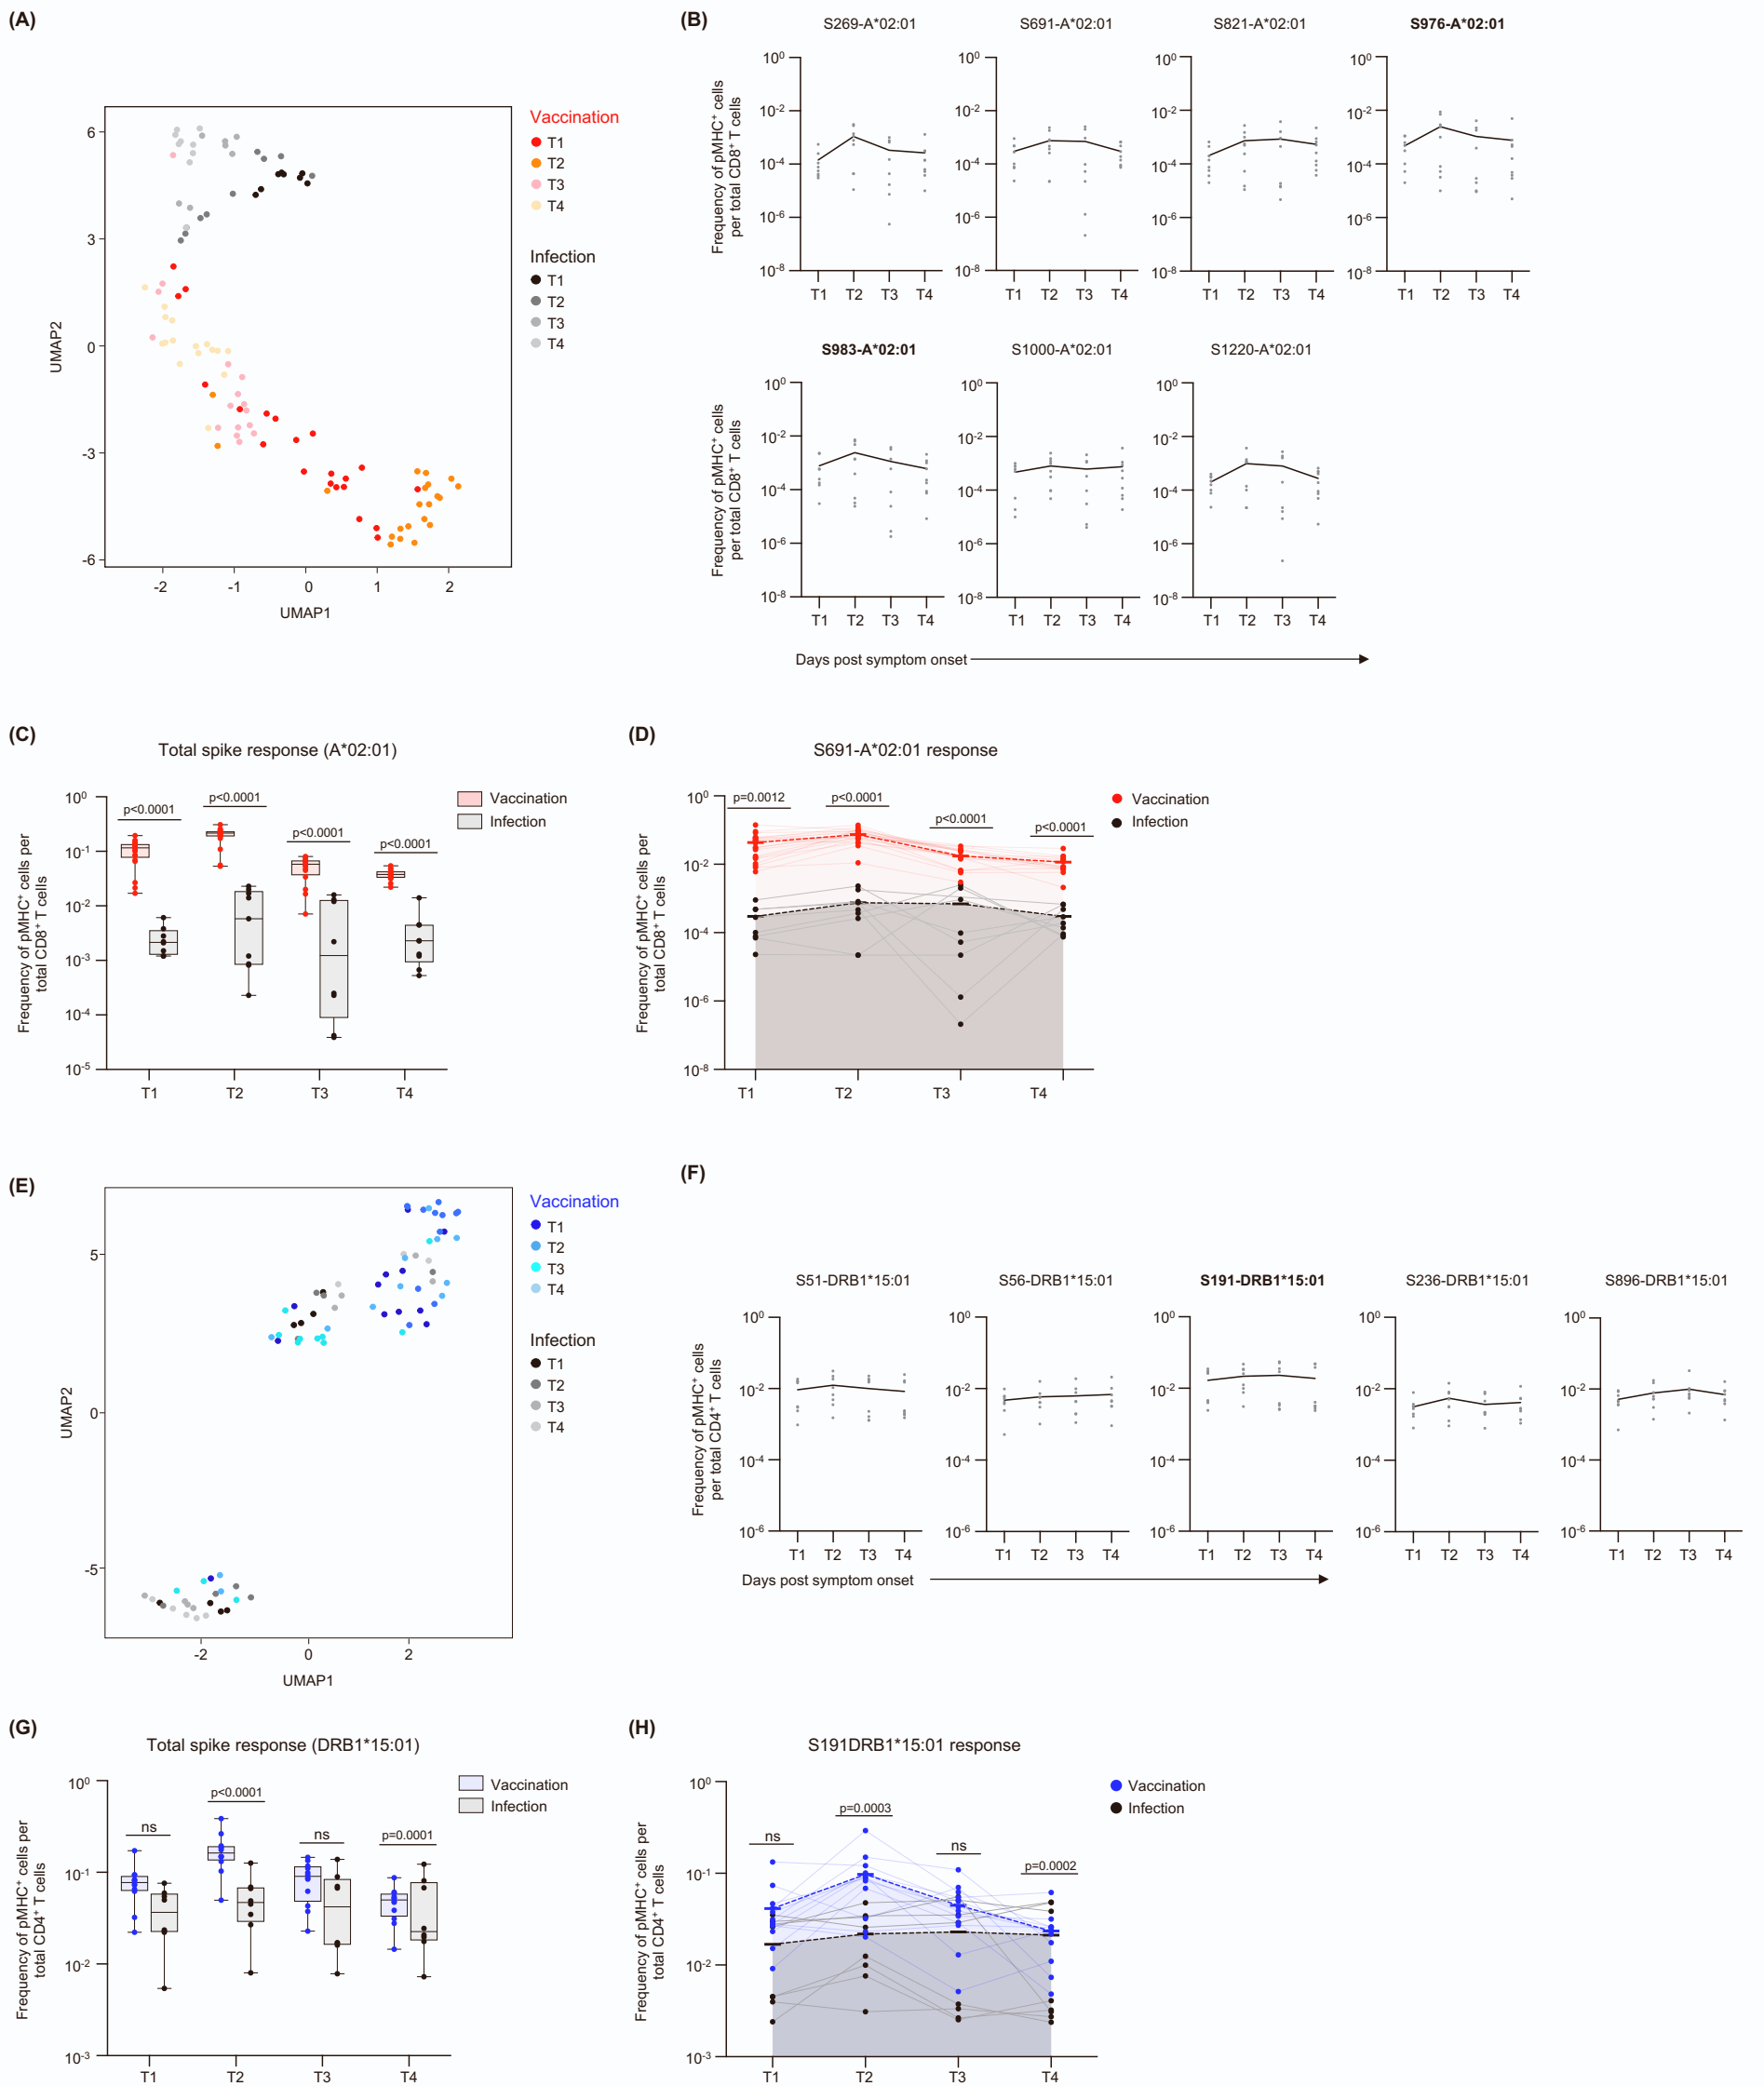

**Supplementary figure 3. The comparison of BNT162b2 vaccination and SARS-CoV-2 infection induced spike-specific T cell response. (A)** UMAP representation of flow cytometry data, depicting the trajectory of spike-specific CD8<sup>+</sup> T cell profiles after vaccination and natural infection in HLA-A\*02:01 restricted individuals. Each dot represents one individual. The color code indicates the time points of sample collection. **(B)** The magnitude of CD8<sup>+</sup> T cell response to spike epitopes in COVID-19 patients. The comparison of CD8<sup>+</sup> T cell response to **(D)** the spike protein and to **(E)** the dominant epitope (S691) between vaccinees and COVID-19 patients. **(E)** UMAP representation of flow cytometry data, depicting the trajectory of spike-specific CD4<sup>+</sup> T cell profiles after vaccination and natural infection in HLA-DRB1\*15:01 restricted individuals. Each dot represents one individual. The color code indicates the time points of sample collection. **(F)** The magnitude of CD4<sup>+</sup> T cell response to spike epitopes in COVID-19 patients. The comparison of CD4<sup>+</sup> T cell response to **(G)** the spike protein and to **(H)** the dominant epitope (1691) between vaccinees and COVID-19 patients. Related to Figure 3 and 4.

Supplementary figure 4

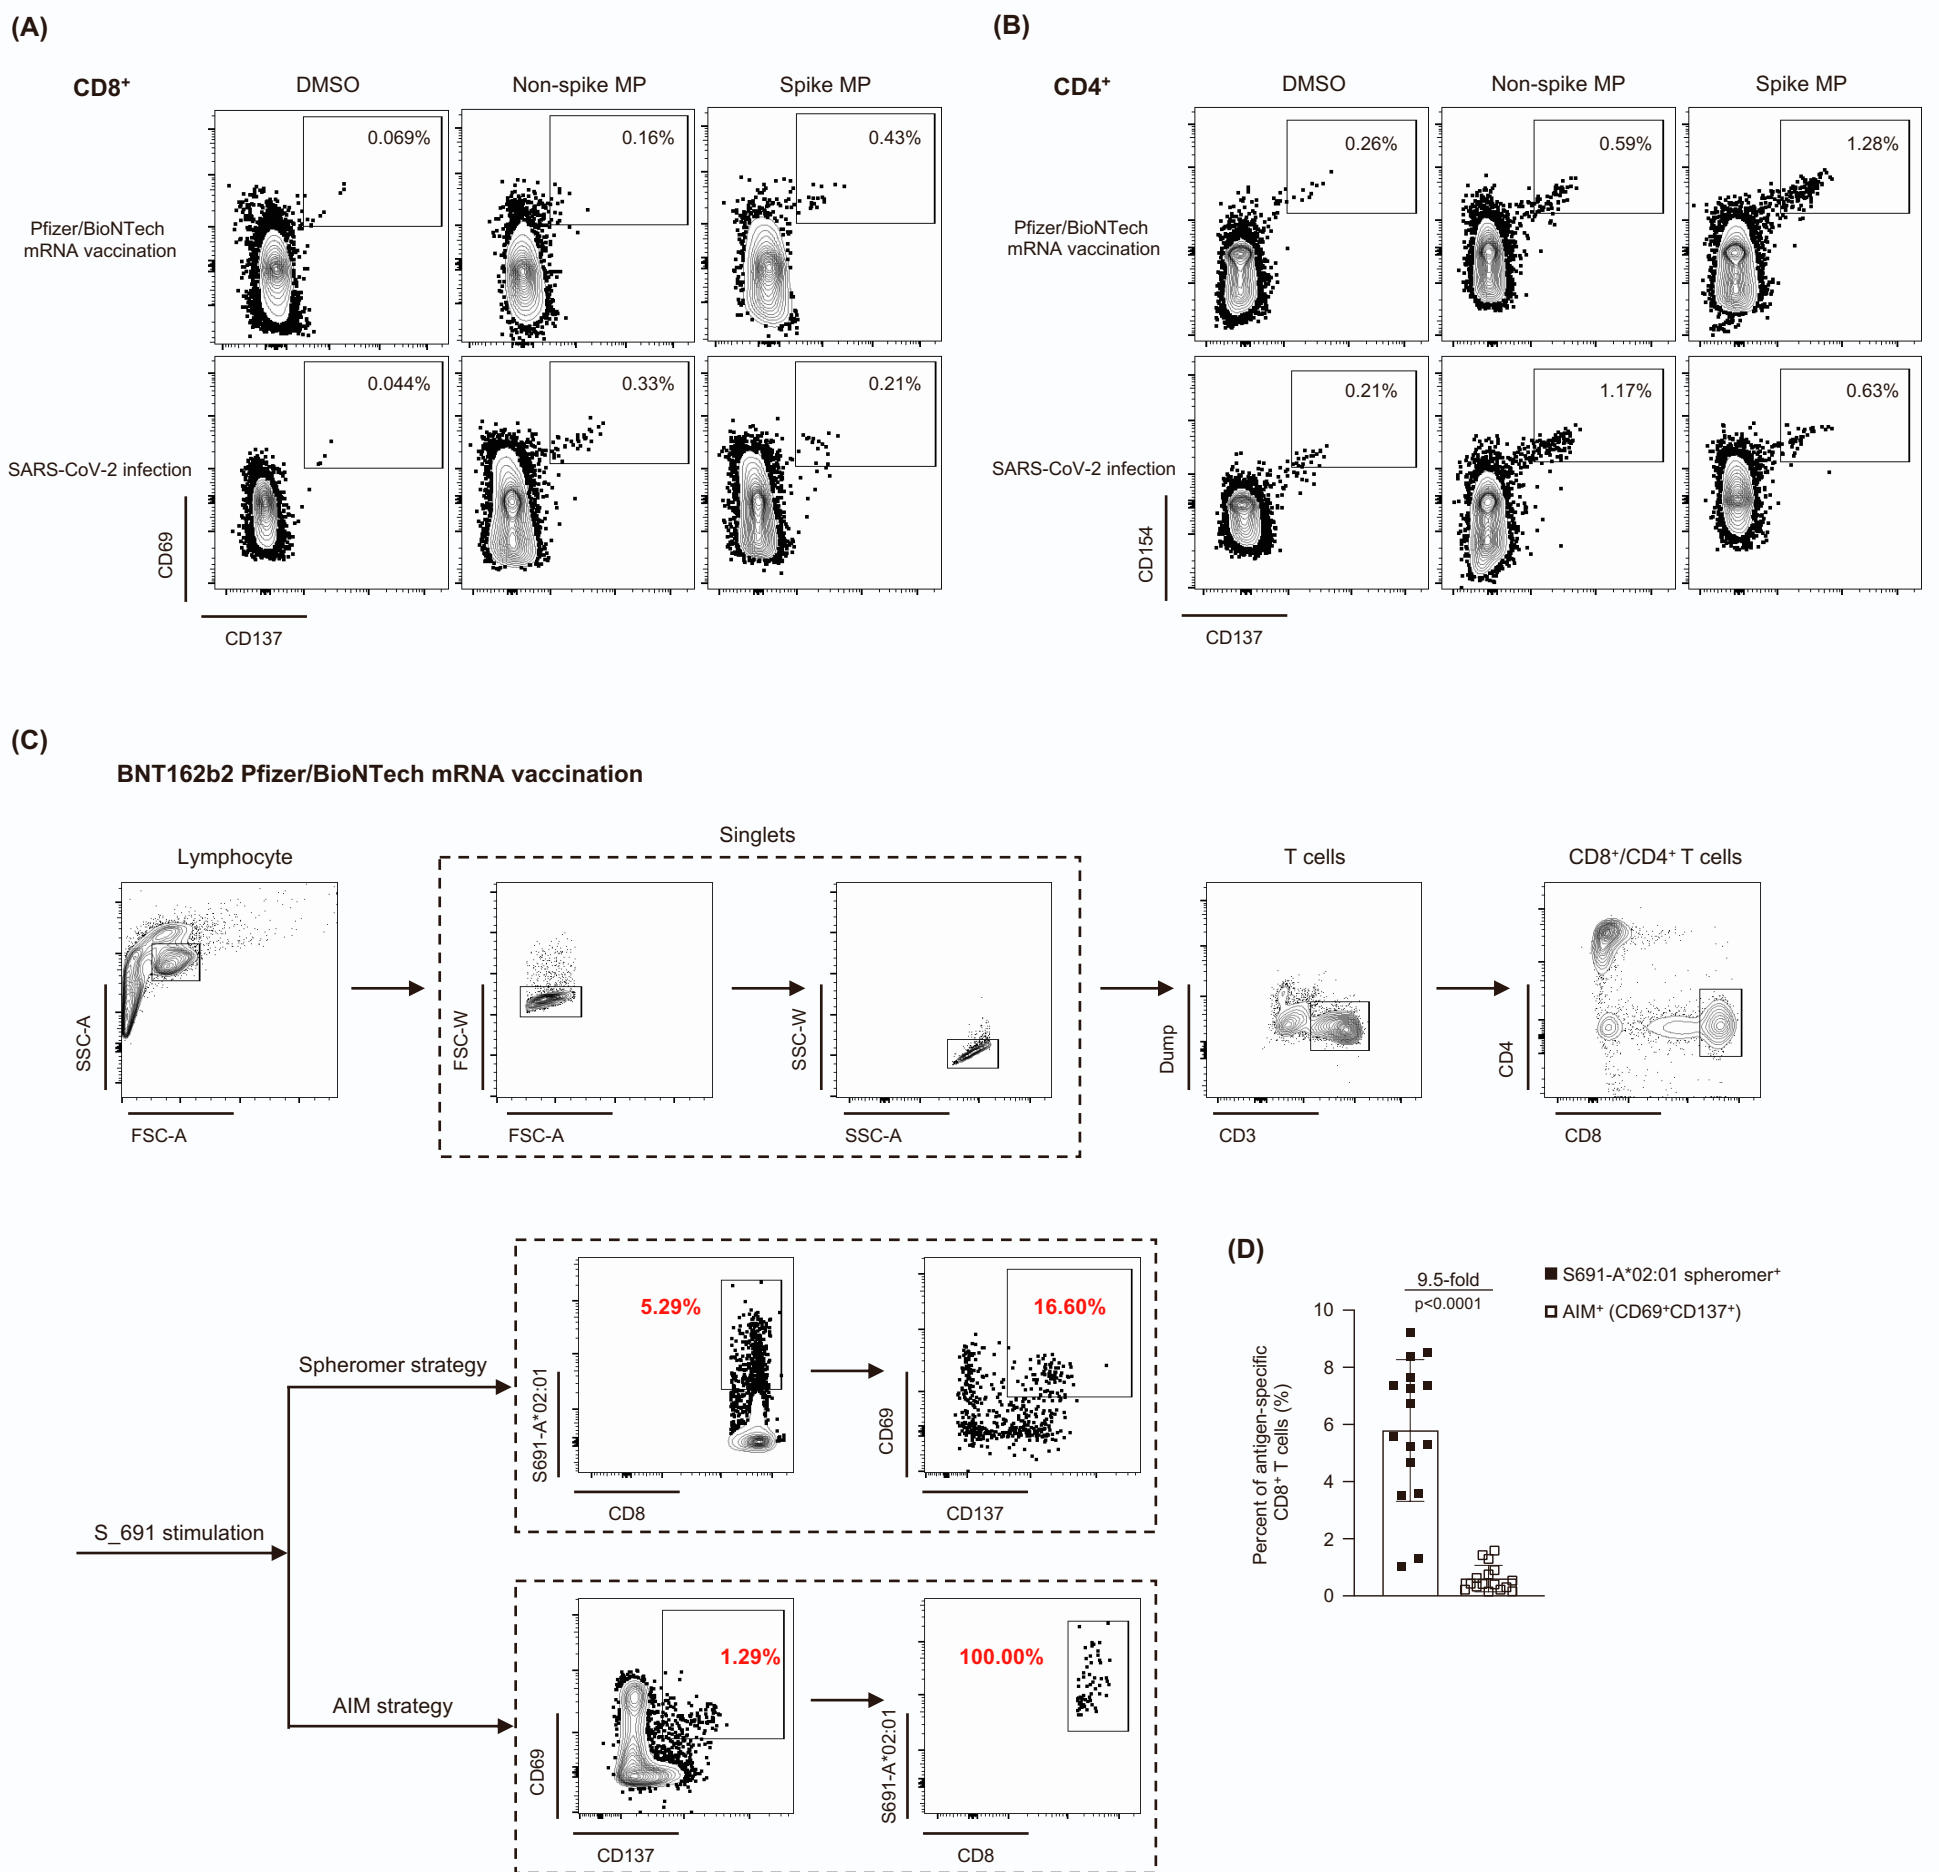

**Supplementary figure 4. Antigen-specific CD8<sup>+</sup> T cell measured by AIM assay. (A) and (B)** Representative FACS plots of spike and non-spike specific CD8<sup>+</sup> and CD4<sup>+</sup> T cells after peptide mega pools (MPs) stimulation. PBMCs of SARS-CoV-2 naïve vaccinees (day 42) and COVID-19 patients (T2) were stimulated with the spike MP, non-spike MP or DMSO. The gating strategy for the AIM assay is illustrated by representative plots defining spike-specific and non-spike-specific **(A)** CD8<sup>+</sup> and **(B)** CD4<sup>+</sup> T cells by expression of CD69<sup>+</sup>CD137<sup>+</sup> and CD154<sup>+</sup>CD137<sup>+</sup>, respectively. **(C)** and **(D)** The comparison of antigen-specific CD8<sup>+</sup> T cell captured by spheromer staining and AIM assay. **(C)** Gating strategy of spheromer staining (upper panel) and AIM assay (lower panel) after peptide (S691) stimulation of day 42 PBMCs samples in HLA-A\*02:01 restricted naïve vaccinees. **(D)** The frequency of HLA-A\*02:01/S691 specific CD8<sup>+</sup> T cells captured by spheromer staining and AIM assay. Data are presented as mean ± SD. Related to Figure 3 and 4.

## Supplementary figure 5

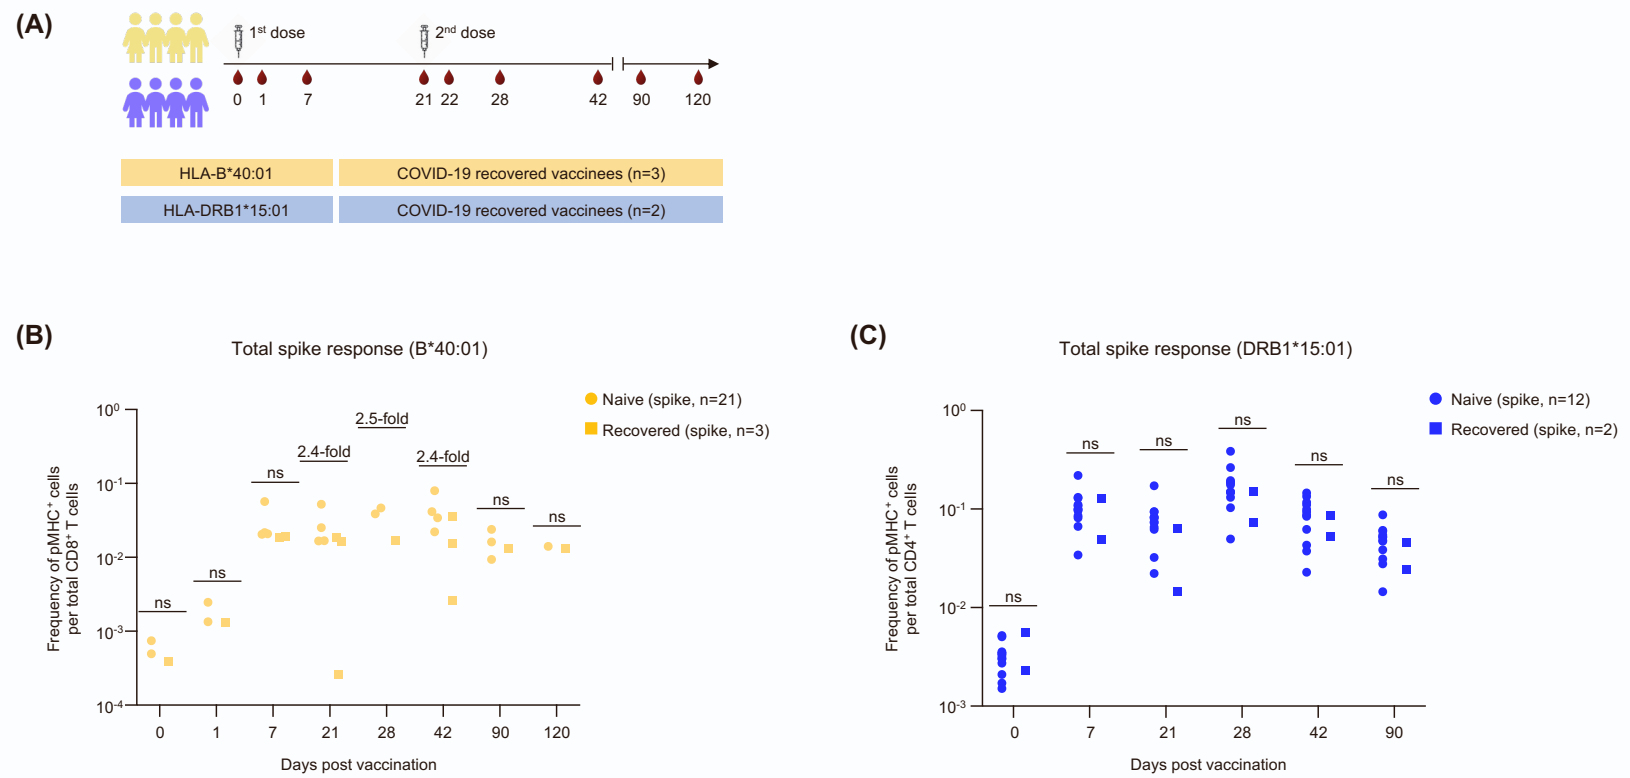

**Supplementary figure 5. The magnitude of vaccine-elicited CD8<sup>+</sup> and CD4<sup>+</sup> T cell responses to spike epitopes in recovered COVID-19 patients.** **(A)** Experimental design to study the longitudinal epitope-specific CD8<sup>+</sup> and CD4<sup>+</sup> T cell responses to BNT162b2 vaccine in vaccinees recovered from previous COVID-19 infection. Timeline indicating the collection of sequential blood samples from HLA-B\*40:01 (day 0, 1, 7, 21, 28, 42, 90 and 120) and HLA-DRB1\*15:01 (day 0, 7, 21, 28, 42 and 90) restricted recovered vaccinees. The number of donors (n) is indicated. The comparison of **(B)** CD8<sup>+</sup> and **(C)** CD4<sup>+</sup> T cell responses to spike protein in naïve and recovered vaccinees. Data are presented as mean ± range. Related to Figure 5.
